# Supplementary material for: Metabolomic profiling on plasma reveals potential biomarkers for screening and early diagnosis of intestinal-type gastric cancer and precancerous stages
Source: Research Square preprint supplement (doi:10.21203/rs.3.rs-18127/v3), 2020-11-12
Supplement: Supplementary file 1 [file 5d02f5bbacb7d045d19cad7c.xlsx]

## Sheet: Datesate
Condition	0.04_113.9646m/z	0.06_72.9387m/z	0.06_118.9433m/z	0.09_154.9999m/z	0.19_160.9894m/z	0.52_118.0863m/z	0.58_230.8905m/z	0.59_213.9135n	0.59_197.9342n	0.59_82.0145m/z	0.59_145.0177m/z	0.59_87.0064n	0.59_85.9861n	0.59_64.5016n	0.59_78.0097n	0.59_458.8581m/z	0.59_45.9938n	0.59_69.0045n	0.60_163.9347n	0.59_129.9588n	0.59_73.5308m/z	0.59_57.9913n	0.59_47.9864n	0.59_117.0228m/z	0.59_442.8795m/z	0.59_258.9977m/z	0.59_170.9322m/z	0.59_114.0403m/z	0.59_59.0110n	0.59_200.9621n	0.60_83.9543n	0.59_344.8766m/z	0.59_102.9708m/z	0.59_87.9463n	0.59_56.9664m/z	0.59_312.9220m/z	0.59_149.0116m/z	0.59_189.0974m/z	0.59_161.0663m/z	0.59_172.0643m/z	0.59_182.9044m/z	0.59_85.0534m/z	0.59_572.8353m/z	0.59_132.9994m/z	0.60_130.0865m/z	0.60_61.0070m/z	0.60_223.9893m/z	0.60_70.0655m/z	0.60_91.0278m/z
EGC	14540.8	0	954.788	1260.06	34.869	11187.1	0	275.267	0	48.1822	0	225.214	0	0	0	0	0	2.67917	0	14.2354	0	0.235683	0	3.06292	0	0	0	0	0	0	1604.11	0	0	2.37396	0	0	0	0	0	0	0	0	0	0	424.192	0	0	59.5061	0
EGC	11237.3	13.5088	686.005	1190.88	85.3177	8733.27	0	329.178	0	59.5213	11.8884	184.36	0.109237	0	12.201	0	8.32207	0	0	0	0	0	0	0	0	0	0	1.49636	0	0.447794	1273	0	0	0.979716	0	0	6.78925	0	0	0	0	0	0	0	627.242	0	0	0	0
EGC	13450	0	998.137	1224.74	84.7715	9753.89	0	320.934	1.55868	25.3095	13.7146	134.221	0	3.95998	11.1826	0	6.41445	0	0	20.476	0	2.62476	0	0	0	0	0	0	0	0	1449.31	0	0	0.742042	0	0	0	0	0	0	0	0	0	0	522.885	0	0	57.7573	3.5358
EGC	12681.9	0	1012.59	1256.21	28.1727	8801.17	0	683.588	8.45156	61.7601	8.00947	269.078	0	4.11935	39.9784	0	10.3715	0	0	8.17795	0	3.68537	0	3.34295	0	0	0	0	0	0	1201.86	0	0	2.75316	0	0	10.7147	0	0	0	0	0	0	0	551.003	0	0	8.28913	2.16671
EGC	14181.9	42.8397	958.099	1115.52	0	9349.9	0	995.645	1.16023	36.1669	17.7253	181.957	0	2.75712	5.81145	20.1336	10.2872	0	0	17.8461	0	5.49998	0	0.878773	0	0.949035	0	0.000969626	3.48777	0	1415.87	0	0	1.97269	0	0	3.04697	0	0	0	0	0	0	0	473.235	0	0	39.5331	1.29634
EGC	13949.8	0	1255.57	1211.15	72.5963	8635.48	0	1246.3	0	42.1427	24.0801	118.19	4.15287	0	34.1407	0	9.3593	0.622502	0	24.3789	0	0.438679	0	1.09503	0	0	0	0	2.71845	0	1435.9	0	0	1.51105	0	0	0	0	0	0	0	0	0	0	765.929	0	0	25.0924	4.31436
EGC	14605.2	0	1264.35	1025.48	267.378	8222.4	0	1382.97	0	1.62394	11.9477	128.374	0	5.32917	0	7.73309	5.0906	0	0	28.3331	0	2.9739	0	6.25485	0	0	0	0	0	0	1056.97	0	0	1.18937	0	0	3.13782	0	0	0	0	3.48094	0	0	709.379	0	0	33.8129	0
AGC	16756.4	25.6411	901.022	1033.24	42.3401	14137.4	0	71.3371	0	61.8954	23.3066	122.68	0	3.40478	9.94226	0	0.084264	0	0	6.61381	0	5.38014	0	9.25475	0	0	0	0	1.48153	0	1415.9	0	0	1.74908	0	0	0	0	0	0	0	0	0	0	539.371	0	0	46.5866	0
AGC	13782	0	744.252	887.393	99.6238	11145.5	0	36.6173	11.3037	2.21219	26.8748	79.5352	0	5.50475	13.2565	0	39.6816	0	0	3.75165	0	0	0	6.61482	0	0	0	0.000528002	2.90307	0	1633.61	0	0	3.64134	0	0	11.5146	0	0	0	0	0	0	0	733.717	0	0	86.7696	0
AGC	14364	0	839.659	1081.39	0	11258.4	0	0	1.96736	59.3304	34.4121	297.862	0	9.48448	16.9594	0	18.4786	0	0	34.8766	0	0.260846	0	0	0	0	0	0	0	0	968.192	0	0	3.79872	0	0	0	0	0	0	0	0	0	0	774.806	0	0	81.0633	0
AGC	14312.9	27.6806	705.085	931.422	42.3241	11088.9	0	116.442	0	89.9888	15.2042	291.91	0	7.19664	0	0	16.5511	0	0	7.30314	0	8.73328	0	0	0	0	0	0	0	0	1605.56	0	0	5.66142	0	0	0	0	0	0	0	5.50024	0	0	567.933	2.60113	0	72.9959	0
AGC	12900.4	18.9826	1455.03	1147.61	207.116	11350.9	0	170.746	0	38.79	70.2451	157.677	0	9.30562	11.18	0	24.7579	0	0	47.4761	0	2.36744	0	0	0	0	0	0	0	0	2476.19	0	0	6.41137	0	0	8.06139	0	0	0	0	2.38627	0	0	620.071	0	0	60.7243	0
AGC	12381.5	0	668.263	733.67	67.2994	8949.61	109.335	18071.6	11474.7	4867.98	6632.3	19317.7	2276.79	1224.1	1304.65	2451.12	1101.04	626.512	2186.3	940.768	426.273	979.796	340.658	432.786	1110.94	493.326	318.646	144.787	261.989	776.073	77542.6	2454.65	1028.77	1009.64	148.311	342.16	174.624	291.107	139.688	120.1	114.791	52.3353	356.358	68.1013	299.916	534.05	1002.34	19.4851	114.426
AGC	13975.9	0	824.332	1311.69	84.1997	10035	114.615	19128.5	12302.9	5403.24	6657.44	20087	2453.26	1255.89	1365.49	2742.42	1166.39	653.101	2135.66	909.559	384.288	1039.17	354.154	473.237	1659.09	531.551	319.458	141.524	281.144	704.93	81597.4	2178.61	1061.44	1029.8	180.127	437.371	179.679	191.117	135.717	129.942	136.431	32.7369	366.842	51.5714	366.396	470.54	993.01	38.5172	106.385
AGC	12478.5	0	958.946	781.944	39.3454	8808.27	0	189.984	0	107.124	17.4063	330.052	0	0	11.8533	0	27.4693	0	0	12.0531	0	0	0	0	0	0	0	1.24774	0	0	1127.71	0	0	2.19662	0	0	0	3.60281	0	0	0	0	0	0	533.132	0	0	34.4921	0
AGC	12375.1	0	646.42	1021.15	104.147	8804.53	0	548.799	0	27.4545	15.7829	221.431	0	0	33.4874	0	10.7798	0.701098	0	31.6955	0	0.0117033	0	2.10555	0	0	0	0	0	0	1536.19	0	0	0.0431463	0	0	0	0	0	0	0	0	0	0	486.486	0	0	20.9216	2.08997
AGC	13736.9	0	784.368	807.937	53.0875	9124.09	0	664.822	0	23.0084	26.6227	155.065	0	0	17.8556	0	16.8665	0	0	24.9983	0	5.80915	0	0.847185	0	0	0	0	0	0	1377.49	0	0	0.127068	0	0	0	0	0	0	0	5.51145	0	0	813.093	0	0	0	0
AGC	13598.7	17.1753	944.095	982.654	69.8494	9455.83	0	714.813	0	10.3708	21.3094	122.239	0	3.43579	28.494	0	9.7377	0	0	26.7994	0	0.0661318	0	0	0	0	0	0	0	0	1481.47	0	0	5.24913	0	0	13.3496	0	0	0	0	1.64702	0	0	534.737	0	0	21.7542	2.07531
AGC	15018.3	0	1267.03	1391.81	45.6681	9731.58	0	996.653	3.89799	112.129	62.3753	244.203	0	14.0471	21.2563	0	39.4543	0.962844	0	24.4525	0	14.2601	0	4.9363	0	0	0	1.55093	14.5604	0	1824.86	0	0	6.54081	0	0	0	0	0	0	0	0.423109	0	0	570.297	0	0	33.5994	7.39488
AGC	16360.5	67.9571	1323.65	826.064	51.6069	10337.3	0	662.085	0	5.86837	14.214	84.9678	0	0	20.7092	0	36.9215	0	0	0	0	0.0587059	0	0	0	0	0	0	0	0	1851.84	0	0	4.65387	0	0	0	0	0	0	0	0	0	0.188778	612.132	0	0	43.0781	0
AGC	13884.7	56.8657	1136.76	1066.88	68.8035	8014.42	0	950.205	0	8.37269	2.29214	88.0143	0	0	23.7978	0	16.5403	1.86773	0	10.2022	1.98996	1.70196	0	0.18259	0	0	0	0	0	0	1408.38	0	0	3.24717	0	0	2.56818	0	0	0	0	0	0	0	669.523	2.00676	0	36.1511	0
AGC	15478.9	0	1403.34	1060.84	45.2643	9603.94	0	1207.91	0	0	26.457	129.608	0	0	13.2619	0	10.606	0	0	27.679	0	0	0	0	0	0	0	0	30.9906	0	1418.47	0	0	6.93977	0	0	0	0	0	0	0	6.25409	0	0	458.18	0	0	0	3.60972
AGC	12544.5	0	553.754	519.743	33.1927	11965.9	135.488	26076.8	15000.5	6237.11	8446.15	25435.7	3332.28	1494.57	1950.98	4542.99	1543.16	734.493	3334.75	1213.75	481.539	1305.45	425.445	626.694	2472.85	648.838	370.045	152.769	277.124	516.543	100079	2991.47	1339.54	1099.81	219.345	553.502	209.298	204.108	162.64	98.1295	112.498	69.8601	774.743	74.024	394.623	575.622	1016.32	21.1511	149.248
AGC	12964.4	18.8171	1262.6	976.749	70.0922	7785.11	155.203	19170.7	12948.9	5479.22	6482.58	21784.8	2839.3	1341.47	1506.64	3198.93	1335.49	665.501	2420.66	924.919	516.586	1005.17	442.005	495.783	2117.7	584.885	301.414	146.008	285.433	866.519	84314.1	2752.8	1037.57	914.568	185.517	440.876	152.732	286.97	146.016	120.603	123.977	39.2331	680.724	77.7824	596.729	512.357	896.342	101.874	92.9488
AGC	14573.3	0	1535.95	1276.8	121.359	9066.21	145.775	27387.7	11890.2	5089.16	8079.22	18549.8	2334.74	1147.76	1275.95	3414.35	1108.87	748.111	2579.59	1007.46	425.324	1187.8	356.808	543.564	1280.66	569.245	413.697	91.0973	241.9	601.812	110342	3089.6	1129.25	1082.28	219.143	264.106	221.286	172.378	113.779	114.882	105.755	88.3123	382.778	46.976	493.486	668.009	459.344	24.8397	139.896
AGC	15035.6	0	1404.74	1276.48	153.649	9219.29	0	1289.48	0	18.7401	0	115.143	7.47469	5.84596	0	8.39982	4.53032	0	0	27.3107	0	21.3555	0	0	0	0	0	0	0	0	1591.52	0	0	11.9965	0	0	0	0	0	0	0	0	0	0	673.373	0	0	51.5287	9.17191
AGC	14552	0	1423.27	1485.43	54.6641	8633.28	0	1245.05	0	4.10991	25.0994	179.521	0	2.36826	17.0044	0	3.52947	0	0	36.6925	0	9.94513	0	0	0	0	0	0	3.33085	0	1416.18	0	0	0	0	0	0	0	0	0	0	3.1906	0	0	648.297	0	0	106.881	0
AGC	14704.2	16.0064	1635.43	1247.96	103.469	8816.01	0	707.538	2.20723	57.7381	13.395	258.153	0	13.5305	12.3016	0	14.4758	0.361593	0	23.4058	0	15.5965	0	0	0	0	0	0	0	0	1735.08	0	0	0.786868	0	0	2.00941	0	0	0	0	6.94715	0	0	659.587	0	0	70.2805	0
AGC	14037.4	24.6814	1643.9	1263.95	130.429	8461.5	0	745.216	1.63371	82.6567	26.076	165.524	0	8.76567	26.6514	0	2.21459	0	0	25.0639	0	0	0	0	0	0	0	0	0	0	1393.39	0	0	0.889059	0	0	0	0	0	0	0	0	0	0	527.912	0	0	26.7877	0
AGC	13019.5	24.1395	1136.92	1047.95	85.7489	7635.69	0	742.523	0	9.06206	22.655	70.3279	0	3.31263	14.0636	0	25.6099	0.97849	0	2.97217	0	2.17592	0	3.13843	0	0.00030788	0	0	0	0	1148.99	0	0	4.57541	0	0	0	0	0	0	0	0	0	0	543.167	0	0	30.2916	0
AGC	19483.1	42.1818	1809.58	1802.04	463.985	10960.2	178.661	28346.8	17623.8	7206.76	9753.41	28840.1	3643.18	1689.68	2023.66	3941.45	1681.82	867.662	3358.61	1217.23	518.584	1511.83	511.003	642.193	2446.47	652.725	486.452	185.926	352.369	1025.13	114296	3384.32	1320.21	1359.12	276.233	620.142	237.771	266.435	209.225	163.968	172.291	111.536	866.707	51.943	393.496	685.472	1191.41	58.2004	154.818
AGC	18005.5	0	1550.45	1250.56	63.5977	9965.02	0	1786.89	0	23.938	25.9215	111.786	1.0797	0	8.0946	0	19.8765	0	0	19.0169	0	0.381927	0	0	0	0	0	0	0	0	1443.4	0	0	7.56423	0	0	0	0	0	0	0	0	0	0	789.399	0	1.44668	105.013	0
CSG	13987.9	39.1435	879.196	935.167	29.7525	12245.7	0	0	0	27.8169	25.0211	120.087	0	0	0	0	35.1251	0	0	4.85716	0	7.87968	0	0	0	0	0	0	1.92718	3.97324	975.37	0	0	0.768784	0	0	0	0	0.920876	0	0	0	0	0	686.718	0	0	69.0862	0
CSG	12782.1	0	754.027	969.784	27.0263	10547	0	0	14.2968	2.97853	8.22496	110.173	0	0	10.5714	0	9.69895	0	0	23.6181	0	0	0	2.21209	0	0	0	0	0	0	1143.31	0	0	0.345515	0	0	0	0	0	0	0	0.531929	0	0	598.983	0	0	57.4339	0
CSG	14419.2	17.1172	890.459	917.51	154.409	12641	0	44.2127	0	20.4095	12.1562	187.567	5.8922	0	31.665	0	8.73928	4.47654	0	2.85738	0	0	0	0	0	0	0	0	0	0	1482.5	0	0	0.37395	0	0	0	0	0	0	0	0	0	0	677.738	0	0	44.1405	0
CSG	15232.2	0	971.074	1044.52	0	12137.2	0	0	2.83043	1.30403	0	123.749	7.51421	0	13.4564	0	7.46248	0	0	29.1244	0	0	0	10.9417	0	0	0	0	0.237732	0	1294.1	13.5323	2.66407	0.239403	0	0	13.0603	0	0	0	0	0	0	0	600.098	0	0	14.8066	0
CSG	13733.1	0	856.389	1174.66	0	11190.7	0	0	0	3.05055	0	144.506	0	1.95462	18.6906	0	11.6885	0.215423	0	8.84706	0	11.8877	0	0	0	0	0	4.72178	0	0	1453.94	0	0	0.335764	0	0	0	0	0	0	0	0	0	0	531.201	0	0	54.6766	0
CSG	14256.5	0	797.773	1268.22	131.667	11577.9	0	59.4367	0	12.4306	27.4004	117.224	0	1.38742	12.1427	0	7.52503	0	0	8.3252	0	0	0	0	0	0	0	0	0	0	1203.33	0	0	0.00693351	0	0	0	0	0	0	0	0	0	0	522.14	0	0	60.0804	0
CSG	11165.5	0	531.913	775.394	48.4643	9040.66	0	62.316	6.90727	12.6023	0	144.869	0	1.57262	17.8848	0	20.9967	0	0	9.8924	0	10.5262	0	2.17652	0	0	0	0	0	0	906.719	0	0	0.515241	0	0	0	0	0	0	0	0.724679	0	0	490.591	0	0	43.6472	0
CSG	12476.3	19.2577	586.557	781.921	27.6475	9534.93	0	64.0016	7.05133	75.1988	9.8905	340.187	0	9.65539	23.7821	0	11.2752	0	0	0	0	23.4978	0	7.43711	0	0	0	3.37728	1.45899	0	1157.07	0	0	8.58472	0	0	16.9535	0	0	0	0	0	0	0	514.959	0	0	49.5826	0
CSG	13483.8	0	665.74	780.581	100.213	10246.7	0	275.277	5.58568	72.0943	15.7232	250.002	0	0	24.8105	0	19.7774	0	0	0	0	0.179853	0	0	0	0	0	0	0	0	1228.92	33.9048	0	2.08844	0	0	0	0	0	0	0	0	0	0	521.442	0	0	25.2098	0
CSG	12187.3	0	605.446	783.721	0	9155.62	0	320.105	0	49.6211	18.8329	228.205	0	0	7.83083	0	10.8463	0	0	9.26751	0	3.35651	0	0.161518	0	0	0	0	0	2.20935	1343.95	0	0	1.31131	0	0	0	0	0	0	0	6.7492	0	0	383.924	0	0	35.103	0
CSG	11912.4	8.32246	592.594	618.671	34.1417	8550.15	0	177.38	2.81613	0	0	34.5904	0	3.11992	0.813595	0	18.8752	0	0	14.6105	0	5.17934	0	5.88906	0	0	0	0	0	0	1235.73	0	0	2.37919	0	0	0	0	0	0	0	0	0	0	445.483	0	0	55.7068	0
CSG	11914.2	0	797.295	759.667	40.1005	8704.16	0	201.456	3.84152	50.7077	21.8338	127.531	0	5.06052	14.522	0	13.0016	0	0	20.9781	0	19.7799	0	1.3684	0	0	0	0	0	0	965.997	0	0	0	0	0	0	0	0	0	0	0	0	0	359.525	0	0	18.2256	0
CSG	12336.9	18.7003	802.733	819.46	0	9096.33	0	425.019	0	27.5061	0	102.716	0	0	0	0	0	0	0	17.5729	0	6.30639	0	0	0	0	0	0	21.0951	0	1421.97	0	0	0.734771	0	0	0	0	0	0	0	0	0	0	363.481	0	0	21.3721	0
CSG	11358.8	0	600.244	800.65	31.7799	8254.78	0	354.911	0	60.4042	21.0194	200.574	0	3.97191	26.2058	0	17.3997	0	0	14.0532	0	5.8018	0	4.72547	0	0	0	0.927666	15.0539	0	1440.57	0	0	0.174104	0	0	0	0	0	0	0	0	0	0	396.377	0	0	17.3807	2.97937
CSG	11082.2	0	651.904	668.946	0	8268.31	0	203.94	6.63691	1.96921	7.92963	94.4925	0	0	18.164	0	11.2989	1.45614	0	18.9459	0	10.2461	0	3.32613	0	0	0	0	0	0	1345.83	0	0	1.73853	0	0	0	0	0	0	0	1.94597	0	0	459.89	0	0	30.0377	0
CSG	12087.1	14.2338	834.646	859.965	36.7165	8690.54	0	254.957	0	4.63531	6.18306	117.714	0	0.272713	17.7559	0	21.1918	0	0	2.23476	0	13.3478	0	0	0	0	0	0	0	0	1485.04	0	0	4.53695	0	0	0	0	0	0	0	2.06926	0	0	493.84	0	0	40.8043	4.95191
CSG	12197.3	22.985	565	851.535	0	8644.27	0	425.845	0	0	0	53.4642	0	0	0	0	11.8448	0	0	0	0	0.050798	0	0	0	0	0	4.4333	0	0	887.428	0	0	2.15509	0	0	0	0	0	0	0	0	0	0	325.7	0	0	0	0
CSG	12980.2	0	1019.25	940.311	69.3705	8596.48	0	235.84	0	0	0	74.8182	0	0	37.2644	0	16.1151	0.132174	0	22.0191	0	3.14366	0	0	0	0	0	0	0	0	1188.8	0	0.251823	7.377	0	0	0	0	0	0	0	0	0	0	503.33	0	0	73.1135	2.12145
CSG	13756.2	24.5106	987.97	994.291	98.3067	9522.43	0	566.998	0	15.1393	26.808	125.917	0	0	9.30391	0	0	0	0	6.17352	0	3.03321	0	3.45321	0	0	0	0	0	0	1184.42	0	0	0.193706	0	0	2.78048	0	0	0	0	0	0	0	275.657	0	0	0	0
CSG	13074	52.8579	594.975	858.514	148.407	7983.09	0	500.568	7.63707	35.0676	24.7954	145.296	0	0	37.4914	0	13.883	0	0	5.41394	0	0.326259	0	0	0	0	0	10.5928	0	0	1228.76	0	0	1.12695	0	0	0	0	0	0	0	0	0	0	586.736	0	0	23.6904	0
CSG	8810.16	12.5156	522.858	599.575	22.1443	9421.36	0	768.515	11.4757	29.3401	0	210.208	8.20859	3.14252	8.44678	1.70513	7.8681	5.34999	0	0	0	0.823165	0	4.22503	0	0	0	0	0	0	1301.38	0	0	1.63748	0	0	3.10028	0	0	0	0	0	0	0	529.914	0	0	24.7096	8.10236
CSG	12642	49.5423	1043.18	1076.06	115.743	8764.98	0	684.213	0	47.0544	19.1538	164.277	6.27336	5.78846	25.8888	0	15.3869	0.105717	0	18.5467	0	8.41571	0	5.37184	0	0	0	4.18903	10.3085	0	1264.1	0	0	5.887	0	0	0	0	0	0	0	0	0	0	471.23	0	0	24.2051	2.68675
CSG	12060.7	0	1059.81	642.164	37.4665	8341.22	0	570.969	0	11.9082	23.78	185.658	7.31736	1.01439	8.09809	0	0.46324	0	0	0	0	4.04101	0	1.97721	0	0	0	0	0	0	1436.1	0	0	3.83851	0	0	7.80482	0	0	0	0	1.16107	0	0	454.714	0	0	23.2279	7.29314
CSG	12487.8	10.0203	935.435	1032.55	0	8394.93	0	724.866	0	59.0468	12.5407	192.371	0	3.30137	28.2013	0	5.08062	2.17612	0	18.0081	0	0.157232	1.04582	0	0	0	0	0	0	6.25326	1429.23	0	0	6.33184	0	0	3.50525	0	0	0	0	1.2333	0	0	518.967	0	0	65.7836	2.90282
CSG	13002.8	0	1333.57	746.303	31.67	8364.17	0	407.353	1.09595	133.513	10.5198	317.599	15.5162	32.383	40.1613	0	9.40948	0	0	27.5828	0	0.0406754	0	5.46025	0	0	0	0	0	0	1216.49	0	0	3.47839	0	0	0	0	0	0	0	0	0	0	329.295	0	0	34.6066	0
CSG	13215.5	37.4516	1008.58	1218.75	100.859	8689.45	0	763.499	5.66128	0	6.48658	154.257	0.675133	0	15.0563	0	4.09897	0	0	6.26013	0	0.00566466	0	0	0	0	0	0	0	0	1554.68	0	0	1.00113	0	0	0	0	0	0	0	3.1691	0	0	368.035	0	0	36.6454	2.8544
CSG	12429.2	19.3285	1357.51	742.422	39.0519	8246.93	0	734.143	0	78.4588	22.1206	266.16	0	0	57.255	0	10.4358	0	0	18.5835	0	10.5422	0	0	0	0	0	0	6.08696	0	1012.76	0	0	0.446237	0	0	0	0	0	0	0	0	0	0	453.985	0	0	48.0768	0
CSG	13904.6	48.2323	992.219	1029.72	139.33	8534.35	0	531.281	3.23195	7.6321	17.3555	195.082	6.42654	0	18.6436	0	24.0375	3.05708	0	0	0	0.203177	0	0	0	0	0	0	0.0851997	0	1201.38	0	0	1.18721	0	0	0	0	0	0	0	2.68459	0	0	256.882	0	0	0	0
CSG	12351.1	0	800.022	1155.71	195.644	8399.65	0	866.761	5.8307	53.517	2.72636	160.222	0	3.7115	22.7194	0	0	0	0	5.3164	0	2.99551	0	6.60943	0	0	0	0	0	0	1177.24	0	0	5.37927	0	0	0	0	0	0	0	4.26767	0	0	422.661	0	0	23.2207	3.20835
CSG	12400.7	19.5059	1050	971.854	65.1109	8155.47	0	377.225	0	52.8842	28.2162	123.715	0	0	18.5557	5.08153	1.59363	0	0	33.4757	0	11.6417	0	0.00634027	0	0	0	2.75873	0	0	1100.46	0	0	1.97206	0	0	0	0	0	0	0	1.16638	0	0	465.582	0	0	35.1254	3.32771
CSG	12966.8	0	1046.42	980.55	40.4662	8520.35	0	499.154	0	66.1609	32.0152	166.636	9.04722	0	9.5863	0	16.4135	0	0	8.65267	0	14.2048	0	0	0	0	0	0	0	0	1517.63	0	0	2.05305	0	0	0	0	0	0	0	1.69185	0	0	369.921	0	0	0	0
CSG	12852.1	37.0461	975.909	973.707	113.875	8320.27	0	910.733	0.106088	9.6199	0	75.1372	0	0	6.96152	0	3.21034	2.8786	0	1.63534	0	4.75465	0	2.4706	0	0	0	0	0	0	905.343	0	0	3.16319	0	0	9.36682	0	0	0	0	0	0	0	432.789	0	0	27.8531	1.47702
CSG	12980.2	20.9347	1107.58	869.943	81.9668	8496.83	0	593.956	0	51.1664	6.61034	157.98	7.71491	6.26074	17.6254	0	0	0	0	0	0	14.5267	0	4.10288	0	0	0	0	0	0	1546.4	0	0	2.84	0	0	2.24823	0	0	0	0	0.867137	0	0	447.782	0	0	23.1399	0
CSG	13923.6	38.5748	1302.49	1032.14	79.4329	8940.17	0	532.271	1.0819	0.119212	0	108.468	0	0	41.3967	0	23.8715	0	0	32.9578	0	20.837	0	3.87629	0	0	0	0	0	0	1054.43	0	0	1.05757	0	0	0	0	0	0	0	0	0	0	566.638	0	0	56.9547	0
CSG	14005	0	1286.9	1272.95	117.65	9239.32	0	626.914	0	13.7345	19.3986	197.674	0	0	42.2698	0	1.50026	0	0	7.11637	0	1.54623	0	2.31807	0	0	0	0	0	0	1478.63	0	0	1.66136	0	0	0	0	0	0	0	0	0	0	451.704	0	0	0	5.71362
CSG	13656.7	13.5122	1337.62	1241.52	84.0497	8703.55	0	507.032	0	45.578	32.4043	171.169	0	0	15.5255	0	25.2597	0	0	4.5234	0	1.3766	0	0	0	0	0	4.55802	0	0	1445.07	0	0	5.47822	0	0	0	0	0	0	0	0	0	0	347.597	0	0	0	0
CSG	13119.9	0	1210.35	909.561	106.004	8564.89	0	985.203	0	28.9354	41.185	107.925	0	3.10118	9.51199	0	38.6231	0	0	11.1214	0	0.677404	0	0	0	0	0	0	4.03196	0	1528.51	0	0	3.25741	0	0	0	0	0	0	0	0	0	0	538.06	0	0	31.6826	2.53827
CSG	12994.6	18.1819	1277.05	965.149	80.3159	7849.91	0	519.335	4.01079	10.9284	21.5115	70.0526	0	0	16.6087	0	0.182484	0	0	32.7473	0	0.163738	0	0	0	0.00217988	0	0.11051	0	0	1208.55	0	0	6.89446	0	0	0	0	0	0	0	0.297599	0	0	579.639	0	0	32.3255	0
CSG	14283.2	0	1253.22	1418.52	145.397	9039.8	0	585.838	3.73216	42.9826	28.6214	126.939	0	8.59289	0	0	7.10956	0	0	29.9933	0	7.3976	0	0.104509	0	0.0142145	0	0	0	0	1558.18	0	0	0.0666683	0	0	0	0	0	0	0	0	0	0	470.822	0	0	48.3814	0
CSG	14008.8	14.2545	1280.83	1142.39	120.373	8493.17	0	1143.37	6.12068	95.7866	15.3506	288.946	0	0	26.3107	0	2.1712	1.08687	0	6.4976	0	0	0	0	0	0	0	2.32336	0	0	1361.71	0	0	3.96968	0	0	0	0	0	0	0	0	0	0	517.823	0	0	38.3766	0
CSG	13362.9	23.212	1525.26	1056.74	80.142	7722.73	0	652.846	1.29407	58.543	18.2984	201.702	8.94932	2.01332	0	0	29.5495	0	0	46.4696	0	2.5457	0	2.56739	0	0	0	0	0	0	1145.16	0	0	0.129109	0	0	0	0	0	0	0	5.29729	0	0	510.459	0	0	26.2419	4.67348
CSG	13828	42.1704	1373	921.035	46.0002	8177.63	0	505.336	0	61.0871	10.3216	194.684	3.46088	0	12.4199	0	0	0	0	0.549515	5.49234	0	0	0	0	0	0	0	0	0	1353.64	0	0	0.603781	0	0	3.10568	0	0	0	0	1.47254	0	0	499.992	0	0	24.4708	0
CSG	13150.7	39.3603	1349.02	1167.1	129.826	8096.14	0	1060.03	9.92234	89.9914	18.2593	213.058	0	4.99315	5.11034	3.21852	1.7283	3.73624	0	11.2167	0	2.00661	0	0	0	0	0	3.50749	23.7219	0	904.255	0	0	3.47004	0	0	0	0	0	0	0	0	0	0	565.421	0	0	32.5727	2.76058
CSG	13988.9	21.0952	1450.17	1259.52	132.554	8555.57	0	610.177	0	50.0554	22.1531	134.624	0	14.1801	13.1507	0	11.7639	0	0	30.6411	0	0.513523	0	3.28746	0	0	0	0	0	0	1094.44	0	0	3.2375	0	0	0	0	0.108063	0	0	0	0	0	579.32	0	0	70.1457	0
CSG	15674.9	11.2097	1196.4	1217.22	57.4106	9358.68	0	1093.54	0	73.7231	19.4289	292.353	0	0	5.26539	0	42.1651	0	0	21.4944	0	0.00158825	0	0	0	0	0	5.0106	0	0	1527.07	0	0	0.842127	0	0	0	0	0	0	0	0	0	0	662.272	0	0	75.734	0
CSG	17238.9	0	1886.27	1660.22	38.5125	10275.4	0	908.564	0	10.4817	34.603	158.062	9.76152	5.30937	15.9297	0	49.2493	0	0	62.8488	0	6.35946	0	0.149319	0	0	0	0	3.46933	0	1318.77	0	0	9.66723	0	0	3.98431	0	0	0	0	0	0	0	588.562	0	0	29.0664	0
CSG	15431.1	44.9125	1513.23	1447.3	0	8879.26	0	831.395	6.92519	6.95354	26.2981	150.927	0	7.80263	14.0324	0	41.121	0	0	63.9266	0	14.333	0	4.03949	0	0	0	0	0	0	1509.68	0	0	4.11788	0	0	0	0	0	0	0	0	0	0	500.32	0	0	28.8551	0
CSG	13875.9	0	1707.96	1190.51	282.386	8334.49	0	663.607	0	35.913	34.4355	153.284	3.18391	2.1473	5.12488	0	14.3942	3.85194	0	61.1362	0	1.04168	0	4.62466	0	0	0	0.013337	0	0	1328.55	43.5959	0	9.12701	0	0	0	0	0	0	0	0	0	0	448.141	0	0	21.5237	0
CSG	20261.1	56.7787	2119.33	1524.94	246.863	11915.8	0	1882.46	0	16.6262	0	103.355	0	0	38.1845	0	20.7918	1.45384	0	32.4828	0	6.23468	0	0.16646	0	0	0	3.34791	4.13346	0	2000.54	0	0	0.362634	0	0	0	0	6.13821	0	0	2.68074	0	0	818.705	0	0	53.4595	0
CSG	9442.75	0	387.457	578.609	0	8984.61	0	1586.22	0	62.0529	0	227.808	22.8932	0	53.7304	0	21.2612	0	0	0	0	0	0	0	0	0	0	0	25.8585	0	1041.1	0	0	1.64889	0	0	0	0	0	0	0	2.2936	0	0	526.002	0	0	27.4024	0
[truncated: 2,154 more columns]
